# Supplementary material
Source: PubMed Central journal article supplement (PMC3048145)
Supplement: 1016150108_pnas.1016150108_SI.pdf [file 1016150108_pnas.1016150108_SI.pdf]

# Supporting Information

Witz et al. 10.1073/pnas.1016150108

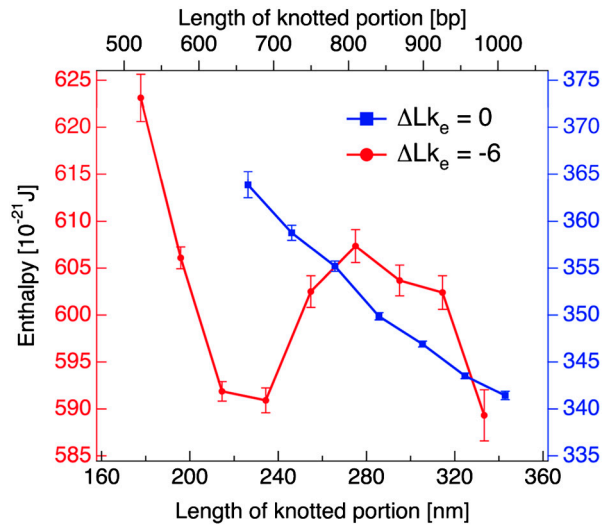

**Fig. S1.** Enthalpy of relaxed ( $\Delta Lk_e = 0$ ) and supercoiled ( $\Delta Lk_e = -6$ ) knots. Enthalpy is composed of bending, torsional, and electrostatic energies. Data were calculated on the basis of 80,000 configurations. Error bars correspond to the error on the mean.
